# Supplementary material for: Cultural Influences on Complementary Feeding Beliefs amongst New Chinese Immigrant Mothers in England: A Mixed Methods Study
Source: MDPI journal article supplement (doi:10.3390/ijerph17155468), 2020-07-29
Supplement: s1 [file s1]

# Supplementary Materials

## Infant Feeding Styles Questionnaire (IFSQ)- Survey Questions and Quantitative Component

|                      | Feeding Style | Item Description                                                                                       | 1 | 2 | 3 | 4 | 5 |
|----------------------|---------------|--------------------------------------------------------------------------------------------------------|---|---|---|---|---|
| <b>Laissez-Faire</b> |               |                                                                                                        |   |   |   |   |   |
| Attention            |               | <i>Behavior items</i>                                                                                  |   |   |   |   |   |
|                      | LF1           | When (name of child) has/had a bottle, I prop/propped it up                                            |   |   |   |   |   |
|                      | LF2           | (Child) watches TV while eating                                                                        |   |   |   |   |   |
|                      | LF3           | I watch TV while feeding (child)                                                                       |   |   |   |   |   |
|                      |               | <i>Belief items</i>                                                                                    |   |   |   |   |   |
|                      | LF4           | I think it is okay to prop an infant's bottle                                                          |   |   |   |   |   |
|                      | LF5           | It's okay for a toddler to walk around while eating as long as s/he eats                               |   |   |   |   |   |
| Diet quality         |               | <i>Behavior items</i>                                                                                  |   |   |   |   |   |
|                      | LF6           | I keep track of what food (child) eats <sup>d</sup>                                                    |   |   |   |   |   |
|                      | LF7           | I keep track of how much food (child) eats <sup>d</sup>                                                |   |   |   |   |   |
|                      | LF8           | I make sure (child) does not eat sugary food like candy, ice cream, cakes or cookies <sup>c, d</sup>   |   |   |   |   |   |
|                      | LF9           | I make sure (child) does not eat junk food like potato chips, Doritos and cheese puffs <sup>c, d</sup> |   |   |   |   |   |
|                      |               | <i>Belief items</i>                                                                                    |   |   |   |   |   |
|                      | LF10          | A toddler should be able to eat whatever s/he wants for snacks                                         |   |   |   |   |   |
|                      | LF11          | A toddler should be able to eat whatever s/he wants when eating out at a restaurant                    |   |   |   |   |   |
| <b>Pressuring</b>    |               |                                                                                                        |   |   |   |   |   |
| Finishing            |               | <i>Behavior items</i>                                                                                  |   |   |   |   |   |
|                      | PR1           | Try to get (child) to finish his/her food                                                              |   |   |   |   |   |
|                      | PR2           | If (child) seems full, encourage to finish anyway                                                      |   |   |   |   |   |
|                      | PR3           | Try to get (child) to finish breastmilk or formula                                                     |   |   |   |   |   |
|                      | PR4           | Try to get (child) to eat even if not hungry                                                           |   |   |   |   |   |
|                      | PR5           | Insist retry new food refused at same meal                                                             |   |   |   |   |   |
|                      | PR6           | Praise after each bite to encourage finish food                                                        |   |   |   |   |   |
|                      |               | <i>Belief Items</i>                                                                                    |   |   |   |   |   |
|                      | PR7           | Important for toddler finish all food on his/her plate                                                 |   |   |   |   |   |
|                      | PR8           | Important for infant finish all milk in his/her bottle                                                 |   |   |   |   |   |
| Cereal               |               | <i>Behavior items</i>                                                                                  |   |   |   |   |   |
|                      | PR11          | Give/gave (child) cereal in the bottle                                                                 |   |   |   |   |   |
|                      |               | <i>Belief items</i>                                                                                    |   |   |   |   |   |
|                      | PR12          | Cereal in bottle helps infant sleep thru the night                                                     |   |   |   |   |   |
|                      | PR13          | Putting cereal in bottle good b/c helps infant feel full                                               |   |   |   |   |   |
|                      | PR14          | An infant <6 mo needs more than formula or breastmilk to be full                                       |   |   |   |   |   |
|                      | PR15          | An infant <6 mo needs more than formula or breastmilk to sleep through the night                       |   |   |   |   |   |
| Soothing             |               | <i>Behavior items</i>                                                                                  |   |   |   |   |   |
|                      | PR16          | When (child) cries, immediately feed him/her                                                           |   |   |   |   |   |
|                      |               | <i>Belief items</i>                                                                                    |   |   |   |   |   |
|                      | PR17          | Best way to make infant stop crying is to feed                                                         |   |   |   |   |   |
|                      | PR18          | Best way to make toddler stop crying is to feed                                                        |   |   |   |   |   |
|                      | PR19          | When infant cries, usually means s/he needs to be fed                                                  |   |   |   |   |   |
| <b>Restrictive</b>   |               |                                                                                                        |   |   |   |   |   |
| Amount               |               | <i>Behavior items</i>                                                                                  |   |   |   |   |   |
|                      | RS1           | I carefully control how much (child) eats                                                              |   |   |   |   |   |

|                               |      |                                                                                     |  |  |  |  |  |
|-------------------------------|------|-------------------------------------------------------------------------------------|--|--|--|--|--|
|                               | RS2  | I am very careful not to feed (child) too much                                      |  |  |  |  |  |
|                               |      | <i>Belief Items</i>                                                                 |  |  |  |  |  |
|                               | RS3  | Important parent has rules re: how much toddler eats                                |  |  |  |  |  |
|                               | RS4  | Important parent decides how much infant should eat                                 |  |  |  |  |  |
| Diet Quality                  |      | <i>Behavior items</i>                                                               |  |  |  |  |  |
|                               | RS5  | I let (child) eat fast food <sup>C</sup>                                            |  |  |  |  |  |
|                               | RS6  | I let (child) eat junk food <sup>C</sup>                                            |  |  |  |  |  |
|                               |      | <i>Belief items</i>                                                                 |  |  |  |  |  |
|                               | RS7  | A toddler should never eat fast food                                                |  |  |  |  |  |
|                               | RS8  | An infant should never eat fast food                                                |  |  |  |  |  |
|                               | RS9  | A toddler should never eat sugary food like cookies                                 |  |  |  |  |  |
|                               | RS10 | A toddler should never eat junk food like chips                                     |  |  |  |  |  |
|                               | RS11 | A toddler should only eat healthy food                                              |  |  |  |  |  |
| <b>Responsive</b>             |      |                                                                                     |  |  |  |  |  |
| Satiety                       |      | <i>Behavior items</i>                                                               |  |  |  |  |  |
|                               | RP1  | (Child) lets me know when s/he is full                                              |  |  |  |  |  |
|                               | RP2  | (Child) lets me knows when s/he is hungry                                           |  |  |  |  |  |
|                               | RP3  | I let (child) decide how much to eat                                                |  |  |  |  |  |
|                               | RP4  | I pay attention when (child) seems to be telling me that s/he is full or hungry     |  |  |  |  |  |
|                               | RP5  | I allow (child) to eat when s/he is hungry                                          |  |  |  |  |  |
|                               |      | <i>Belief Items</i>                                                                 |  |  |  |  |  |
|                               | RP6  | Child knows when s/he is full                                                       |  |  |  |  |  |
|                               | RP7  | Child knows when hungry, needs to eat                                               |  |  |  |  |  |
| Attention                     |      | <i>Behavior items</i>                                                               |  |  |  |  |  |
|                               | RP8  | Talk to (child) to encourage to drink formula/breastmilk                            |  |  |  |  |  |
|                               | RP9  | Talk to (child) to encourage him/her to eat                                         |  |  |  |  |  |
|                               | RP10 | Show (child) how to eat by taking a bite or pretending to <sup>C</sup>              |  |  |  |  |  |
|                               | RP11 | I will retry new foods if they are rejected at first <sup>C</sup>                   |  |  |  |  |  |
|                               |      | <i>Belief items</i>                                                                 |  |  |  |  |  |
|                               | RP12 | Important to help or encourage a toddler to eat                                     |  |  |  |  |  |
| <b>Indulgence<sup>e</sup></b> |      |                                                                                     |  |  |  |  |  |
| Permissive                    |      | <i>Behavior items</i>                                                               |  |  |  |  |  |
|                               | ID1  | Allow child watch TV while eating if s/he wants                                     |  |  |  |  |  |
|                               | ID2  | Allow child to eat fast food if s/he wants <sup>C</sup>                             |  |  |  |  |  |
|                               | ID3  | Allow child to drink sugared drinks/soda if s/he wants <sup>C</sup>                 |  |  |  |  |  |
|                               | ID4  | Allow child to eat desserts/sweets if s/he wants <sup>C</sup>                       |  |  |  |  |  |
|                               |      | <i>Belief Items</i>                                                                 |  |  |  |  |  |
|                               | ID5  | Toddlers should be allowed to watch TV while eating if they want                    |  |  |  |  |  |
|                               | ID6  | Toddlers should be allowed to eat fast food if they want                            |  |  |  |  |  |
|                               | ID7  | Toddlers should be allowed to drink sugared drinks/soda if they want                |  |  |  |  |  |
| Coaxing                       |      | <i>Behavior items</i>                                                               |  |  |  |  |  |
|                               | ID9  | Allow child watch TV while eating to make sure s/he gets enough                     |  |  |  |  |  |
|                               | ID10 | Allow child to eat fast food to make sure s/he gets enough <sup>C</sup>             |  |  |  |  |  |
|                               | ID11 | Allow child to drink sugared drinks/soda to make sure s/he gets enough <sup>C</sup> |  |  |  |  |  |
|                               | ID12 | Allow child to eat desserts/sweets to make sure s/he gets enough <sup>C</sup>       |  |  |  |  |  |
|                               |      | <i>Belief Items</i>                                                                 |  |  |  |  |  |
|                               | ID13 | Toddlers should be allowed to watch TV while eating to make sure they get enough    |  |  |  |  |  |

|           |      |                                                                                      |  |  |  |  |  |
|-----------|------|--------------------------------------------------------------------------------------|--|--|--|--|--|
|           | ID14 | Toddlers should be allowed to eat fast food to make sure they get enough             |  |  |  |  |  |
|           | ID15 | Toddlers should be allowed to drink sugared drinks/soda to make sure they get enough |  |  |  |  |  |
|           | ID16 | Toddlers should be allowed to eat desserts/sweets to make sure they get enough       |  |  |  |  |  |
| Soothing  |      | <i>Behavior items</i>                                                                |  |  |  |  |  |
|           | ID17 | Allow child watch tv while eating to keep him/her from crying                        |  |  |  |  |  |
|           | ID18 | Allow child to eat fast food to keep him/her from crying <sup>c</sup>                |  |  |  |  |  |
|           | ID19 | Allow child to drink sugared drinks/soda to keep him/her from crying <sup>c</sup>    |  |  |  |  |  |
|           | ID20 | Allow child to eat desserts/sweets to keep him/her from crying <sup>c</sup>          |  |  |  |  |  |
|           |      | <i>Belief Items</i>                                                                  |  |  |  |  |  |
|           | ID21 | Toddlers should be allowed to watch tv while eating to keep them from crying         |  |  |  |  |  |
|           | ID22 | Toddlers should be allowed to eat fast food to keep them from crying                 |  |  |  |  |  |
|           | ID23 | Toddlers should be allowed to drink sugared drinks/soda to keep them from crying     |  |  |  |  |  |
|           | ID24 | Toddlers should be allowed to eat desserts/sweets to keep them from crying           |  |  |  |  |  |
| Pampering |      | <i>Behavior items</i>                                                                |  |  |  |  |  |
|           | ID25 | Allow child watch tv while eating to keep him/her happy                              |  |  |  |  |  |
|           | ID26 | Allow child to eat fast food to keep him/her happy <sup>c</sup>                      |  |  |  |  |  |
|           | ID27 | Allow child to drink sugared drinks/soda to keep him/her happy <sup>c</sup>          |  |  |  |  |  |
|           | ID28 | Allow child to eat desserts/sweets to keep him/her happy <sup>c</sup>                |  |  |  |  |  |
|           |      | <i>Belief Items</i>                                                                  |  |  |  |  |  |
|           | ID29 | Toddlers should be allowed to watch tv while eating to keep them happy               |  |  |  |  |  |
|           | ID30 | Toddlers should be allowed to eat fast food to keep them happy                       |  |  |  |  |  |
|           | ID31 | Toddlers should be allowed to drink sugared drinks/soda to keep them happy           |  |  |  |  |  |
|           | ID32 | Toddlers should be allowed to eat desserts/sweets to keep them happy                 |  |  |  |  |  |

48 items probe beliefs (code on a 5-point scale: disagree, slightly disagree, neutral, slightly agree, agree) and 57 items probed behaviours (coded on a 5-point scale: never, seldom, half of the time, most of the time, always).

## **Interview Questions- Qualitative Component**

### ***Introduction***

1. Please tell me a bit your thoughts about introducing solid foods to your child
  - a. How do you prepare foods for different meal times with your child?
  - b. What kind of food do you prefer to feed your children?

### ***Complementary feeding practices***

2. Where do you find information about feeding practices?
  - a. Chinese family, friends or practitioner; British family, friends or NHS health services?
  - b. What kind of feeding practices information did they give you?
  - c. Which do you feel are most important?
3. What do you think of when you picture a healthy child?
  - a. Do you think food at a young age effects health in adulthood?
4. How do you prepare foods for different meal times with your child?

5. What kind of food do you prefer to buy for your child
  - a. Where from
6. How do you make the decision to stop feeding your children (portion sizes)?
7. Have you faced any problems with feed your child. If you managed to overcome this problem, how?

### ***Acculturation***

8. Is there different culture between Chinese and British food culture and How do you think the food culture is different between the British and Chinese?
9. Do you give any traditional remedies to a child if he or she is feeling poorly?
10. What culture factors affect your health ideas and practices? Which do you feel are most important?
11. At present, most of time what factors affect you choose foods?
  - a. Chinese or British foods?
  - b. Chinese or British cooking methods?
12. If you think there is feeding culture conflict between British culture and Chinese culture, what factors influence your choice?
13. How do the different food cultures influence the way in which you feed your children?
